# Supplementary material for: Whole genome analysis of selected human and animal rotaviruses identified in Uganda from 2012 to 2014 reveals complex genome reassortment events between human, bovine, caprine and porcine strains
Source: PLoS One. 2017 Jun 22;12(6):e0178855. doi: 10.1371/journal.pone.0178855 (PMC5480867; doi:10.1371/journal.pone.0178855)
Supplement: S2 Table — (XLS) [file pone.0178855.s002.xls]

## Sheet: Sheet1
	S2 Table. The NCBI GenBank accession numbers of the nucleotide and amino acid sequences generated in this study
		Accession numbers for each genome segments
	Study strain name	VP1	VP2	VP3	VP4	VP6	VP7	NSP1	NSP2	NSP3	NSP4	NSP5
	RVA/Human-wt/UGA/KTV-13-023/2012/G12P[6]	KX655484	KX655485	KX655486	KX655487	KX655488	KX655489	KX655490	KX655491	KX655492	KX655493	KX655494
	RVA/Human-wt/UGA/MUL-13-183/2013/G12P[6]	KX632265	KX632266	KX632267	KX632268	KX632269	KX632270	KX632271	KX632272	KX632273	KX632274	KX632275
	RVA/Human-wt/UGA/NSA-13-043/2013/G9P[8]	KX632243	KX632244	KX632245	KX632246	KX632247	KX632248	KX632249	KX632250	KX632251	KX632252	KX632253
	RVA/Human-wt/UGA/MUL-13-163/2013/G9P[8]	KX632287	KX632288	KX632289	KX632290	KX632291	KX632292	KX632293	KX632294	KX632295	KX632296	KX632297
	RVA/Human-wt/UGA/MUL-12-147/2012/G9P[8]	KX632298	KX632299	KX632300	KX632301	KX632302	KX632303	KX632304	KX632305	KX632306	KX632307	KX632308
	RVA/Human-wt/UGA/MUL-12-093/2012/G9P[8]	KX632309	KX632310	KX632311	KX632312	KX632313	KX632314	KX632315	KX632316	KX632317	KX632318	KX632319
	RVA/Human-wt/UGA/MUL-13-285/2013/G9P[8]	KX632320	KX632321	KX632322	KX632323	KX632324	KX632325	KX632326	KX632327	KX632328	KX632329	KX632330
	RVA/Human-wt/UGA/MUL-13-157/2013/G1P[8]	KX632342	KX632343	KX632344	KX632345	KX632346	KX632347	KX632348	KX632349	KX632350	KX632351	KX632352
	RVA/Human-wt/UGA/MUL-12-104/2012/G3P[6]	KX632331	KX632332	KX632333	KX632334	KX632335	KX632336	KX632337	KX632338	KX632339	KX632340	KX632341
	RVA/Human-wt/UGA/MUL-13-308/2013/G8P[6]	KX632254	KX632255	KX632256	KX632257	KX632258	KX632259	KX632260	KX632261	KX632262	KX632263	KX632264
	RVA/Human-wt/UGA/MUL-13-166/2013/G3P[6]	KX632276	KX632277	KX632278	KX632279	KX632280	KX632281	KX632282	KX632283	KX632284	KX632285	KX632286
	RVA/Human-wt/UGA/MUL-13-171/2013/G3P[6]	KX655437 KX655438	KX655439	KX655440	KX655441 KX655442	KX655443	KX655444 KX655445	KX655446	KX655447	KX655448	KX655449	KX655450
	RVA/Human-wt/UGA/MUL-13-204/2013/G8P[6]	KX655451	KX655452	KX655453	KX655454	KX655455	KX655456	KX655457	KX655458	KX655459	KX655460	KX655461
	RVA/Human-wt/UGA/MUL-13-496/2013/G8P[4]	KX655462	KX655463	KX655464	KX655465	KX655466	KX655467	KX655468	KX655469	KX655470	KX655471	KX655472
	RVA/Human-wt/UGA/MUL-12-117/2012/G3P[6]	KX655473	KX655474	KX655475	KX655476	KX655477	KX655478	KX655479	KX655480	KX655481	KX655482	KX655483
	RVA/Human-wt/UGA/MUL-13-160/2012/G8P[4]	KX655495	KX655496	KX655497	KX655498	KX655499	KX655500	KX655501	KX655502	KX655503	KX655504	KX655505
	RVA/Human-wt/UGA/MSK-13-048/2012/G9P[8]	KX655506	KX655507	KX655508	KX655509	KX655510	KX655511	KX655512	KX655513	KX655514	KX655515	KX655516
	RVA/Human-wt/UGA/MUL-13-427/2013/G8P[4]	KX655517	KX655518	KX655519	KX655520	KX655521	KX655522	KX655523	KX655524	KX655525	KX655526	KX655527
	RVA/Goat-wt/UGA/BUW-14-A085/2014/G6P[1]	KY055427	KY055428	KY055429	KY055430	KY055431	KY055432	KY055433	KY055434	KY055435	KY055436	KY055437
	RVA/Cow-wt/UGA/BUW-14-A035/2014/G12P[8]	KX655528	KX655529	KX655530	KX655531	KX655532	KX655533	KX655534	KX655535	KX655536	KX655537	KX655538
	RVA/Pig-wt/UGA/BUW-14-A008/2014/G12P[8]	KY055416	KY055417	KY055418	KY055419	KY055420	KY055421	KY055422	KY055423	KY055424	KY055425	KY055426
	RVA/Pig-wt/UGA/BUW-14-A003/2014/G3P[13]	KY077640	KY077641	KY077642	KY077643	KY077644	KY077645	KY077646	KY077647	KY077648	KY077649	KY077650
	RVA/Pig-wt/UGA/KYE-14-A047/2014/G3P[13]	KX988264	KX988265	KX988266	KX988267	KX988268	KX988269	KX988270	KX988271	KX988272	KX988273	KX988274
	RVA/Pig-wt/UGA/KYE-14-A048/2014/G3P[13]	KX988275	KX988276	KX988277	KX988278	KX988279	KX988280	KX988281	KX988282	KX988283	KX988284	KX988285
